1 **The MHC class-II HLA-DR receptor mediates bat influenza A-like H17N10 virus entry**  
2 **into mammalian cells**

3 **Efstathios S Giotis<sup>1\*</sup>, George Carnell<sup>2,3</sup>, Erik F. Young<sup>4†</sup>, Saleena Ghanny<sup>4††</sup>, Patricia**  
4 **Soteropoulos<sup>4††</sup>, Wendy S Barclay<sup>1</sup>, Michael A Skinner<sup>1</sup>, Nigel Temperton<sup>2</sup>**

5 <sup>1</sup>Section of Virology, Department of Medicine, St Mary's Campus, Imperial College London, UK.

6 <sup>2</sup>Viral Pseudotype Unit, Medway School of Pharmacy, University of Kent and University of  
7 Greenwich, Chatham Maritime, UK.

8 <sup>3</sup>Laboratory of Viral Zoonotics, Department of Veterinary Medicine, University of Cambridge,  
9 UK.

10 <sup>4</sup>Hackensack University Medical Centre Department of Surgery, Hackensack, NJ.

11

12 Current affiliations:

13 <sup>†</sup>Bioelectronic Systems Lab, Columbia University, NY, USA.

14 <sup>††</sup>University of Medicine and Dentistry of New Jersey, Centre for Applied Genomics, Newark,  
15 NJ, USA.

16

17 \*Corresponding author: Efstathios S Giotis [e.giotis@imperial.ac.uk](mailto:e.giotis@imperial.ac.uk)

18

19 **Abstract:**

20 Bats are notorious reservoirs of diverse, potentially zoonotic viruses, exemplified by the  
21 evolutionarily distinct, influenza A-like viruses H17N10 and H18N11 (BatIVs). The surface  
22 glycoproteins [haemagglutinin (H) and neuraminidase (N)] of BatIVs neither bind nor cleave  
23 sialic acid receptors, which suggests that these viruses employ cell attachment and entry  
24 mechanisms that differ from those of classical influenza A viruses (IAVs). Identifying the  
25 cellular factors that mediate entry and determine susceptibility to infection will help assess  
26 the host range of BatIVs. Here, we investigated a range of cell lines from different species for

27 their susceptibility to infection by pseudotyped viruses (PV) bearing bat H17 and/or N10  
28 envelope glycoproteins. We show that a number of human haematopoietic cancer cell lines  
29 and the canine kidney MDCK II (but not MDCK I) cells are susceptible to H17-pseudotypes  
30 (H17-PV). We observed with microarrays and qRT-PCR that the dog leukocyte antigen DLA-  
31 DRA mRNA is over expressed in late passaged parental MDCK and commercial MDCK II cells,  
32 compared to early passaged parental MDCK and MDCK I cells, respectively. The human  
33 orthologue HLA-DRA encodes the alpha subunit of the MHC class II HLA-DR antigen-binding  
34 heterodimer. Small interfering RNA- or neutralizing antibody-targeting HLA-DRA, drastically  
35 reduced the susceptibility of Raji B cells to H17-PV. Conversely, over expression of HLA-DRA  
36 and its paralogue HLA-DRB1 on the surface of the unsusceptible HEK293T/17 cells conferred  
37 susceptibility to H17-PV. The identification of HLA-DR as an H17N10 entry mediator will  
38 contribute to a better understanding of the tropism of the virus and will elucidate its zoonotic  
39 transmission.

40  
41 **Keywords:** influenza, bats, pseudotype virus, MHC-class II, HLA-DR

42  
43 **Abbreviations:** SARS: severe acute respiratory syndrome; MERS: Middle-East respiratory  
44 syndrome; CoV: coronavirus; MDCK: Madin-Darby canine kidney cells; HIV: human  
45 immunodeficiency virus; CD4: cluster of differentiation 4; MHC: Major histocompatibility  
46 complex; ATCC: American type culture collection; gag: group-specific antigen; pol:  
47 polymerase; SEM: standard error of the mean.

48  
49 **Main:**  
50 Outbreaks of SARS, MERS, Nipah and Ebola have highlighted the critical need to focus on the  
51 zoonotic potential of known, and novel, bat viruses to improve forecasting, prevention and  
52 control of epidemics. Viral diversity in bats is exemplified by the discovery of the enigmatic

53 influenza A-like viruses (BatIVs) H17N10 and H18N11 in asymptomatic New World bats  
54 (*Sturnira lilium* and *Artibeus planirostris* respectively)<sup>1,2</sup> and more recently by the detection of  
55 a virus related to avian H9N2 in Egyptian *Rousettus aegyptiacus* bats<sup>3</sup>. Such discoveries  
56 prompted investigation of the pandemic potential of these viruses and led to concern that bats  
57 may be a neglected reservoir of novel influenza viruses<sup>4</sup>.

58 Influenza A viruses (IAVs) are enveloped orthomyxoviruses with eight single-stranded  
59 negative-sense viral RNAs (vRNAs) encapsidated into viral ribonucleoproteins (vRNPs). The  
60 original source of classical IAVs is aquatic birds, from which they emerge, *via* genome  
61 reassortment and mutation, to cause sporadic pandemics in humans, lower animals and other  
62 birds<sup>5, 6</sup>. They are classified into different subtypes based on their envelope glycoproteins  
63 (trimeric haemagglutinin, HA: H1-H18, and tetrameric neuraminidase, NA: N1-N11)<sup>7</sup>. HA is  
64 synthesised as a precursor protein in infected cells and its cleavage by host cell proteases sets  
65 in motion a complex series of events that is initiated by receptor binding and is terminated  
66 with the penetration of the virus into the cytoplasm of target cells<sup>8</sup>. HA conventionally  
67 attaches to host-specific sialic acid (SA) moieties<sup>6</sup>. These are terminal sugars of larger  
68 carbohydrate chains attached to the cell membrane by the lipids or proteins that they  
69 decorate. When HA attaches to them, it triggers endocytosis of the virus into membrane  
70 bound endosomes<sup>9, 10</sup>. Acidification of the endosome induces conformational changes to HA,  
71 which lead sequentially to: insertion of the hydrophobic “HA fusion peptide” into the host  
72 membrane, juxtaposition of the viral and endosomal membranes and subsequent release of  
73 the vRNPs into the cytoplasm via a fusion pore<sup>11, 12</sup>. In contrast, NAs are glycosidases which  
74 primarily cleave cell surface SA and therefore facilitate the release and spread of virus  
75 progeny upon egress, as well as disaggregation of virions before entry<sup>13, 14</sup>.

76 The crystal structures of BatIV HAs and NAs revealed divergence of their protein  
77 conformations from those of conventional IAVs, suggesting distinct binding and functional  
78 properties<sup>2, 15, 16, 17</sup>. Bat H17 and H18 proteins have typical HA folds but lack an obvious cavity

79 to accommodate SA<sup>2, 15, 17</sup>. The cell receptors for the BatIVs are as yet unidentified, but they  
80 are clearly not SA moieties, a conclusion reached by several studies<sup>15, 18, 19</sup>. Furthermore, bat  
81 N10 and N11 are structurally similar to classical NAs but lack conserved amino acids for SA  
82 binding and cleavage<sup>2, 16, 17</sup> and do not exhibit typical neuraminidase activity<sup>18, 20</sup>. Initial  
83 efforts to isolate infectious BatIVs directly from bats have failed, mainly because the receptors  
84 were unknown and susceptible cell lines were unavailable<sup>21, 22, 23</sup>. Attempts to circumvent  
85 these limitations have included H17- or H18-pseudotyped vesicular stomatitis virus (VSV<sup>19,</sup>  
86 <sup>24</sup>), engineered BatIV/IAV chimeric viruses<sup>23, 25</sup>, and authentic BatIVs reconstructed using  
87 reverse genetics<sup>26</sup>. H17-VSV was able to infect bat cell lines (EidNi, HypNi, and EpoNi) but  
88 only a few, common cell lines of flightless mammals, including some of human (U-87 MG  
89 glioblastoma and SK-Mel-28 melanoma) and canine (RIE1495 and MDCK II kidney) origin<sup>19, 24,</sup>  
90 <sup>26</sup>. These cells could also be infected with reconstructed H17N10 and H18N11 viruses<sup>26</sup>. The  
91 ability of BatIVs to infect mammalian cell lines *in vitro*, and their unconventional features,  
92 raised concerns about their zoonotic and epidemic potential. Identifying the BatIV cell surface  
93 receptors and delineating the mechanistic basis of the host-virus interaction are key to  
94 assessing their potential host range and public health significance.

95  
96 HIV-1 derived-pseudotypes bearing heterologous envelope proteins (PV) have been used  
97 widely for the assessment of cellular tropism and the identification of cellular receptors or  
98 attachment factors for a range of viruses<sup>27, 28, 29, 30, 31</sup>. Such pseudotypes have proved a  
99 reliable model to study the capacity of H17N10 for entry into various cell lines<sup>27, 32</sup>. Using this  
100 approach, we have shown that H17-PV, and H17N10-PV (A/little yellow-shouldered  
101 bat/Guatemala/060/2011) are recovered from producer HEK293T/17 cells exclusively in the  
102 presence of the human airway trypsin-like protease (HAT) or the transmembrane protease,  
103 serine 2 (TMPRSS2) (Fig. 1a)<sup>32</sup>. In this study, a panel ( $n=35$ ; Supplementary material 1) of cell  
104 lines from different tissues and species were challenged with H17- and/or N10-PV to study

105 the distribution of the H17N10 receptor(s) (Fig. 1b). Efficiency of infections with PV was  
106 quantified (after 48 h) by the expression of a firefly luciferase (FLuc) reporter gene encoded  
107 by the lentiviral genome. Parallel infections were conducted with PV bearing either classical  
108 H5 (H5-PV; A/Vietnam/1194/2004; H5N1 clade 1) or VSV-G (VSV-G-PV) glycoproteins (the  
109 latter displaying very broad tropism) as positive controls to eliminate possible post-binding  
110 blockage factors. HIV particles produced in the absence of a viral envelope protein ( $\Delta$ -env)  
111 served as a negative control. H17-PV displayed highly limited host and species cell tropism,  
112 suggesting that the H17 cellular receptor(s) are not ubiquitous (Fig. 1b). Of note, the bat cell  
113 lines (lung & kidney) from *S. lilium* in which H17N10 was discovered, were not susceptible to  
114 PV. This implies that expression of the H17-putative receptor(s) and/or viral entry-related  
115 host factors was either lost during immortalisation or is tissue-type restricted. Conversely, we  
116 show that the dog epithelial kidney MDCK II (unlike MDCK I) cells are susceptible to H17-PV  
117 with titers comparable to those of control VSV-G- and H5-PV in the range of  $10^6$  to  $10^7$   
118 RLU/ml (Fig. 1c). They were not susceptible to PV expressing N10 alone and co-expression of  
119 N10 with H17 did not improve infection of MDCK II (Fig. 1c), which suggests that N10 has a  
120 dispensable role in viral entry (*in vitro*). To characterise the H17 putative receptors, MDCK II  
121 cells were either pre-treated with neuraminidase, tunicamycin or pronase or treated with  
122 ammonium chloride before infection with H17-PV. Infectivity with H17- and H5-PVs, as well  
123 as cytotoxicity (by trypan blue exclusion), were assayed 24 h post treatment (Fig. 1d). Pre-  
124 treatment of MDCK II cells with neuraminidase from *Clostridium perfringens* (1-100 mU), which  
125 cleaves cell surface SA, reduced H5-PV infection by 68-86% but did not significantly affect  
126 infection by H17-PV, supporting the notion that SA are not the cell surface receptors for  
127 H17<sup>19, 26</sup>. Classical IAVs primarily enter cells via endocytosis followed by endosomal fusion  
128 triggered by low pH. Treatment of MDCK II cells with the pH neutralising agent ammonium  
129 chloride (1-100 mM) abolished luciferase activity for both H5- and H17-PV, demonstrating  
130 that entry of H17, like IAVs, into target cells is pH-dependent. Similar results were obtained in

131 RIE1495 cells<sup>32</sup>. Entry of H17-PV was more susceptible to pre-treatment of MDCK II cells with  
132 proteases or tunicamycin (an inhibitor of *N*-glycosylation) than was entry of H5-PV (being  
133 reduced by up to 72 and 78%, compared to 45 and 20%, respectively), suggesting that the  
134 H17-cellular receptor(s) may be a glycosylated protein, in line with previous proposals<sup>19</sup>.

135

136 MDCK I and II represent early and late passaged cells from the same parental NBL-2 cell line  
137 (CCL-34, ATCC). MDCK are valuable cell lines in studies of viruses, cell-cell junctions and  
138 epithelial differentiation but consist of heterogeneous cell populations and their phenotypes  
139 vary significantly between user laboratories<sup>33</sup>. In addressing the factors that permit infection  
140 of H17-PV in late passaged MDCK II cells, we considered that parental NBL-2 cells undergo  
141 passage number-dependent phenotypic changes that may be reflected at transcriptional level.  
142 The phenotypic transition of NBL-2 cells to early and late MDCK cells was investigated using  
143 the Affymetrix canine microarray 2.0 (E-GEOD-14837; passages 8 and 21 respectively). The  
144 microarray analysis identified 17 differentially regulated transcripts: 12 up-regulated and 5  
145 down-regulated in late- compared to early-passaged cells (Fig. 2a). The current prevalent  
146 hypothesis is that single or multiple cell surface molecules are essential for the initial  
147 attachment and uptake of enveloped viruses into cells<sup>34, 35</sup>. Therefore, we surveyed the  
148 differentially regulated transcripts for encoded, surface-anchored proteins using a combined  
149 analysis of: available Gene Ontology annotations, existing literature as well as transmembrane  
150 protein domain and subcellular localisation prediction algorithms (Phobius, TMHMM and  
151 DeepLoc). The analysis identified the dog leukocyte antigen class II DR  $\alpha$ -chain (DLA-DRA) as  
152 the only transcript, encoding a membrane protein, over-expressed in late, compared to early,  
153 passage MDCK cells (full data in Supplementary material 2). Significant over-expression of  
154 DLA-DRA (and its paralogue DLA-DRB1) was also confirmed (by qRT-PCR) in MDCK II  
155 compared to MDCK I cells (Fig. 2b).

156

157 DLA-DRA is a well-conserved orthologue of the human leukocyte antigen class II DR  $\alpha$ -chain  
158 (HLA-DRA) (~90% amino acid identity between canine, human and *Desmodus rotundus* bat  
159 ectodomains; Supplementary material 3). In humans, MHC-II molecules occur as three highly  
160 polymorphic isotypes (HLA-DR, HLA-DP and HLA-DQ) which are selectively expressed  
161 under normal conditions on the surface of antigen presenting cells (APCs), including B,  
162 dendritic and mononuclear phagocyte cells. These molecules are non-covalently associated  
163 heterodimers of two glycosylated, transmembrane polypeptide chains, the monomorphic  
164 35-kDa  $\alpha$ -chain and the highly polymorphic 28-kDa  $\beta$ -chain<sup>36</sup>. Both chains have an  
165 extracellular portion composed of two domains ( $\alpha$ 1 and  $\alpha$ 2, or  $\beta$ 1 and  $\beta$ 2) that is anchored  
166 on the cell membrane by short transmembrane and cytoplasmic domains (Fig. 2c). In the  
167 classical scenario, the protease-derived foreign antigen peptides bind to MHC class II proteins  
168 in the cleft formed by the  $\alpha$ 1 and  $\beta$ 1 domains, and the complex is transported to the cell  
169 surface<sup>36, 37</sup>. When antigenic peptides are not available, endogenous peptides such as the class  
170 II associated invariant peptide (CLIP) substitute them and restore MHC class II dimer  
171 stability<sup>37</sup>. The complex of HLA-DR and endocytosed peptides (usually 9-30 amino acids in  
172 length), constitutes a ligand for the T-cell receptor (TCR) and plays a key role in the  
173 presentation of foreign antigens to CD4<sup>+</sup> T helper cells and immune surveillance<sup>38, 39</sup>.

174

175 Since the ultimate goal of our studies is to obtain insight on the zoonotic potential of H17N10,  
176 we focused on the possible influence of HLA-DR on cellular susceptibility to H17. Hence,  
177 taking advantage of the high expression of HLA-DR on certain human hematopoietic  
178 carcinomas<sup>40</sup>, we further explored H17-PV tropism using a panel of human leukaemia and  
179 lymphoma cell lines (Fig. 2d). We found that the Burkitt's lymphoma-derived Raji, Ramos and  
180 BJAB B-lymphocytes and the B lymphoblastoid cells (B-LCL) show decreasing susceptibility,  
181 in that order, to H17-PV. Kasumi-1 leukaemic cells showed marginal susceptibility in terms of  
182 luciferase activity, while Molt-4 and HL-60 leukaemic cells, Jurkat T-cells, pro-monocytic THP-



183 1 and U-937 cells, and primary B cells showed no susceptibility to the pseudotypes (Fig. 2d,  
184 left Y axis). We hypothesised that the different susceptibility of the various cell types by H17-  
185 PV were due to disparate expression of HLA-DR, confirmed by qRT-PCR analysis for a non-  
186 polymorphic region of the  $\alpha$  chain of HLA-DR on the same samples (Fig. 2d, right Y-axis). The  
187 presence of the HLA-DR heterodimer was also confirmed by flow cytometry with a FITC-  
188 conjugated monoclonal antibody (clone Tü36), which specifically binds to a monomorphic  
189 epitope on the HLA-DR  $\alpha/\beta$  complex and not the isolated  $\alpha$  or  $\beta$  chains (Fig. 2e)<sup>41</sup>. Both  
190 approaches indicate association between mRNA levels, the surface expression of HLA-DR  
191 heterodimer and susceptibility to H17-PV. Raji, BJAB and Ramos B cells were found to consist  
192 of 100% HLA-DR<sup>+</sup> cells; Kasumi-1 demonstrated a 7% subpopulation of HLA-DR<sup>+</sup> cells and  
193 MOLT-4 and HL-60 cells were 100% HLA-DR<sup>-</sup>. These results were relatively constant and did  
194 not change with factors such as cell density or passage number.

195

196 To confirm the influence of HLA-DR on H17-PV entry into B cells, HLA-DR was independently  
197 suppressed by siRNA-mediated inhibition or by antibody blocking. Raji B cells were  
198 transfected twice over 48 h with an siRNA mixture specific for HLA-DRA (siHLA-DRA) or a  
199 control siRNA (siControl) and then challenged with the H17-PV for another 48 h. The  
200 efficiency of HLA-DRA knock-down was confirmed by qRT-PCR and western Blot. The mRNA  
201 and protein expression of HLA-DRA was reduced by  $\geq 50\%$  in Raji cells transfected with  
202 siHLA-DRA compared to those transfected with siControl. Knocking down HLA-DRA in Raji  
203 cells correspondingly reduced the infection of H17-PV by 50% (Fig. 2f).

204

205 To determine if blocking attachment of virus to the HLA-DR ectodomain can prevent its entry,  
206 Raji cells were incubated with increasing concentrations of a monoclonal antibody (mAb  
207 Clone 302CT2.3.2) targeting a monomorphic, extracellular region of the HLA-DRA antigen



208 (HLA-DRA epitope: amino acids 48-75). The presence of the antibody significantly reduced, in  
209 a dose-dependent manner, infection with H17-PV but not VSV-G-PV (Fig. 2g).

210

211 We next sought to ascertain whether ectopic expression of HLA-DR was sufficient to increase  
212 the susceptibility of non-APC, HEK293T/17, cells to the H17-PVs. HEK293T/17 cells were  
213 transiently transfected with the DRA expression vector, alone or in combination with DRB1.  
214 Surface expression of the  $\alpha/\beta$  heterodimer was validated using immunofluorescence and flow  
215 cytometry. Expression of either DRA or DRB1 alone resulted in marginal or no increase in  
216 surface staining of HLA-DR or H17-PV infection (data not shown). In contrast, 1:1 co-  
217 expression of both DRA and DRB1 formed a functional  $\alpha/\beta$  heterodimer on the cell surface in  
218 approximately 47% of the cell population (Fig. 2h and Supplementary material 4). This  
219 suggests that both  $\alpha$  and  $\beta$  chains are necessary for cell-surface expression, consistent with  
220 previous studies<sup>42, 43</sup>. Transient over expression of HLA-DR in HEK293T/17 cells resulted in  
221 significant infection by H17-PV. Infection was higher by more than two orders of magnitude  
222 (Fig. 2i) in Fluorescence-activated cell sorting (FACS)-sorted cells enriched for HLA-DR.  
223 Further, expression of the human HLA-DR  $\alpha$  and  $\beta$  chains in the bat *Pteropus alecto* kidney  
224 PakiTO3 cells allowed infection with H17-PV (Supplementary material 5).

225

226 Taken together, HLA-DR is shown to function as a *bona fide* entry mediator for H17 but may  
227 function with unknown factors that facilitate virus internalisation. Interaction between HLA-  
228 DR and H17 may trigger viral entry through canonical receptor-mediated endocytosis, but  
229 could also trigger entry through an activation of cell signalling pathways that the virus  
230 subverts to its advantage. Our finding therefore raises questions on the utility and possible  
231 evolutionary advantage(s) that an APC-associated receptor would confer to H17N10  
232 infectivity and broader fitness. Some viruses exploit cells of the immune system, such as  
233 macrophages, B and dendritic cells, either as viral reservoirs or as “Trojan horses” to

234 penetrate the epithelial barriers<sup>44, 45</sup>. The measles virus for example, exploits macrophages or  
235 dendritic cells, which traffic the virus to bronchus-associated lymphoid tissue or regional  
236 lymph nodes, resulting in local amplification and subsequent systemic dissemination by  
237 viremia<sup>46</sup>. A similar strategy employed by H17N10 could provide an explanation on why viral  
238 RNA was detected in different organs and tissues in carrier *S. liliun* bats (i.e. lung, kidney,  
239 liver, intestine) and why the virus fails to grow *in vitro* in cell lines developed from the same  
240 tissues<sup>1, 26</sup>. The prototypic gammaherpesvirus, Epstein-Barr virus (EBV), employs resting B  
241 cells as transfer vehicles for infection of epithelial cells<sup>47</sup>, and also uses the HLA-DR ( $\beta$ 1  
242 domain) as receptor in order both to enter B cells as well as to impair antigen presentation  
243 (by sterically blocking the engagement of HLA-DR1 and the TCR V $\alpha$  domain)<sup>48, 49, 50</sup>. It is  
244 possible that through efficient binding to HLA-DR, H17N10 may have developed a means of  
245 simultaneously accessing lymphoid cells and blocking T-cell responses. Such an immune  
246 evasion mechanism could explain, at least partially, its survival and asymptomatic status in  
247 carrier bats. With limited functional information available on the bat MHC-II, the biological  
248 role of the host HLA-DR orthologue in the pathogenesis and transmission mechanisms of the  
249 H17N10 virus remains obscure.

250 In this study we did not establish the stoichiometry of the HLA-DR: H17 engagement, or  
251 clarify how the virus moves to sub-membranous regions and might hijack the receptor-  
252 mediated signalling pathway to promote its internalization. It is likely that the determinants  
253 of viral entry *in vivo* are more complicated. We cannot rule out the use by H17N10 (as by  
254 other bat-borne viruses, *e.g.* SARS CoV<sup>51, 52</sup>) of more than one molecular species as (co-)  
255 receptors. Nevertheless, the implication of this study is that H17N10 has the capacity to  
256 enter human HLA-DR<sup>+</sup> cells and our work provides substantial evidence that the H17N10  
257 virus has zoonotic potential. The current finding not only sheds light on the understanding  
258 of BatIV host range, but also provides additional information on the evolution of influenza  
259 A viruses.

260

## 261 **Materials and methods**

### 262 **Cell lines, cell culture and treatment**

263 Cell lines (complete description in Supplementary material 1) were kindly provided as  
264 follows: the HEK293T/17 cells were provided by Dr Edward Wright (University of  
265 Westminster, UK); Kasumi-1, HL-60, Molt-4, Jurkat cells from Professor Paul Farrell (Imperial  
266 College London, UK); *Pteropus alecto* cell lines from Professor Linfa Wang (NUS Duke,  
267 Singapore); *Sturnira lilium*, *Artibeus planirostris*, and *Carolia perspicillata* cell lines have been  
268 generated in the labs of Dr Carles Martínez-Romero/Professor Adolfo Garcia-Sastre (Icahn  
269 School of Medicine, New York) from bat tissue samples originally collected by Dr Eugenia  
270 Corrales-Aguilar (University of Costa Rica); B-LCL were created by Dr Konstantinos Paschos  
271 by infecting with recombinant EBV B cells from isolated peripheral blood monocytes (PBMCs)  
272 of a healthy donor of the prototypical B95-8 background (Imperial College London); Raji,  
273 Ramos and BJAB from Dr Rob White (Imperial College London); U-937 and THP-1, BEAS-2B,  
274 Caco-2 from Dr Marcus Dorner, Dr Michael Edwards and Professor Robin Shattock  
275 respectively (Imperial College London). The rest of cell lines were either from the collection of  
276 Dr Michael Skinner or from ATCC. Primary B cells were a kind gift by Dr Rob White (Imperial  
277 College London). B cells were isolated from peripheral blood leukocyte (PBL) samples  
278 obtained from anonymous buffy coat donors (UK Blood Transfusion Service) by  
279 centrifugation over Ficoll. CD19 microbeads were used for magnetic separation of purified B  
280 cells using an autoMACS separator (Miltenyi Biotec). All cell lines in this study were cultured  
281 according to standard mammalian tissue culture protocols (ATCC; [www.atcc.org](http://www.atcc.org)). Bat cell  
282 lines were propagated in Dulbecco's modified eagle medium (DMEM) (Life Technologies)  
283 supplemented with heat-inactivated 15% fetal bovine serum (Life Technologies), penicillin  
284 (100 U/ml) and streptomycin (100 µg/ml; Invitrogen). All cells were maintained in a

285 humidified incubator at 37°C and 5% CO<sub>2</sub> and were found free of mycoplasma contamination  
286 on repeated testing with the MycoFluor Mycoplasma Detection Kit (Life Technologies, UK).  
287 MDCK II cells were treated as previously<sup>19</sup> with the following modifications. MDCK II cells  
288 were either treated with the endosomal acidification reagent ammonium chloride (1, 10 or  
289 100 mM), or pre-treated with neuraminidase from *Clostridium perfringens* for 2 h (1, 10 or 100  
290 mM) or pronase (a mixture of endo- and exoproteases from *Streptomyces griseus* at a final  
291 concentration of 5, 10 or 50 µg/ml; Calbiochem, UK) for 30 min, an N-glycosylation inhibitor  
292 (tunicamycin from *Streptomyces* sp. at a final concentration of 0.01, 0.1 or 1 µg/ml; Sigma-  
293 Aldrich, UK) for 5 h. Pre-treated cells were washed with phosphate buffer saline (PBS) 3  
294 times, and then incubated/infected as before with PVs for another 24 h. Cell viabilities were  
295 assessed by a trypan blue exclusion test.

#### 296

#### 297 **Lentiviral pseudotype virus production and susceptibility assays**

298 Pseudotypes expressing H17 and N10 genes were produced as described previously<sup>32, 53</sup>.  
299 Briefly, the lentiviral packaging plasmid p8.91<sup>54</sup>, the pCSFLW firefly luciferase lentiviral  
300 vector<sup>55</sup> or the GFP expressing vector pCSGW, the expression plasmids for H17 and/or N10  
301 [vector pl.18<sup>56</sup> and the protease encoding plasmid pCAGGS-HAT (a kind gift by Eva Böttcher-  
302 Friebertshäuser, Philipps University of Marburg, Germany) were co-transfected using  
303 polyethylenimine transfection reagent (Sigma Aldrich, UK) into HEK293T/17 cells, plated on  
304 6-well Nunclon<sup>®</sup> plates (Thermo Fisher Scientific, UK). Supernatants were collected 48-72 h  
305 post transfection and filtered through a 0.45 µm filter (Millipore, UK). To remove viral titer  
306 bias between different PV stocks, pseudotypes were concentrated and (re-) titrated by serial  
307 dilution. Concentration was carried out by ultra-centrifugation for 2 h at 25,000 rpm, 4°C in  
308 the SW32 rotor of a L2-65B Beckman ultra-centrifuge.  
309 Two-fold serial dilutions of PV-containing supernatant were performed as previously  
310 described<sup>32</sup> using white 96-well Nunclon<sup>®</sup> plates (Thermo Fisher Scientific, UK).

311 Subsequently, approximately  $1 \times 10^4$  (for adherent) and  $3 \times 10^4$  cells (for suspension) cells were  
312 added in 50  $\mu$ l of medium per well. Plates were incubated for 48 h, after which 50  $\mu$ l of  
313 Bright-Glo™ substrate (Promega, UK) was added. Luciferase readings were conducted with a  
314 luminometer (FLUOstar OPTIMA, BMG Labtech) after a 5-minute incubation period and  
315 luciferase reading recorded in relative luminescence units (RLU). Data were normalized using  
316  $\Delta$ -env and cell-only measurements and expressed as RLU/ml.

### 317 **Plasmids and transfections**

318 Mammalian expression plasmids (pcDNA3.1+/C-(K)DYK) for HLA-DRA (NM\_019111) and  
319 HLA-DRB1 (NM\_001243965) were purchased from GenScript (Piscataway, NJ; USA).  
320 HEK293T/17 cells at sub-confluence in 6-well plates or 100 mm dishes were transfected  
321 with HLA-DRA plasmid or HLA-DRB1 plasmid or a 1:1 combination of both using the  
322 Lipofectamine 3000 transfection reagent (Thermo Fisher Scientific, UK) according to  
323 manufacturer instructions. 48 h after transfection, cells were used either for  
324 immunofluorescence analysis, or for FACS analysis (cell-surface staining) or for infection  
325 with PV. Under the experimental conditions, the transfection efficiency in either plate/dish,  
326 as assessed by the GFP expression of a co-transfected GFP-expressing control plasmid, was  
327 >70% under microscopic observation. For HLA-DR stably over expressing cells, PakiTO3  
328 cells were transfected with both HLA-DR plasmids and then selected with neomycin (500  
329  $\mu$ g/ml). Single clones were analysed for expression of the over expressed proteins.

### 330 **RNA isolation for microarray analysis**

331 Total RNA was isolated from biological triplicates of early and late passage MDCK from T25  
332 flasks that had been seeded with  $8 \times 10^5$  cells and allowed to become confluent and polarize  
333 over 4 days in culture cells using a Ribopure kit (Ambion, Austin, TX). Acquired RNA was  
334 precipitated with EtOH and subsequently purified employing columns, procedures and  
335 reagents from an RNEasy kit (Qiagen, Germantown, MD) and resuspended in RNase-free H<sub>2</sub>O.  
336 Complementary DNA and RNA synthesis were performed according to Affymetrix Expression

337 Analysis protocols (see [www.affymetrix.com](http://www.affymetrix.com)). Briefly, double-stranded cDNA was synthesized  
338 from 5 µg of total RNA using the Superscript double-stranded cDNA synthesis kit (Invitrogen).  
339 Following phenol/chloroform extraction and ethanol precipitation, a biotin-labeled in-vitro  
340 transcription reaction was carried out using the cDNA template (Enzo Life Sciences,  
341 Farmingdale, NY). Fifteen micrograms of cRNA was fragmented for hybridization to  
342 Affymetrix Canine Genome 2.0 Array GeneChips (Santa Clara, CA), which contains  
343 approximately 18,000 *C. familiaris* mRNA/EST-based transcripts and over 20,000 non-  
344 redundant predicted genes. An one-way ANOVA adjusted with the Benjamini–Hochberg  
345 multiple-testing correction [false discovery rate (FDR) of  $P < 0.05$ ] was performed with Partek  
346 Genomics Suite (v6.6 Partek) across all samples as previously<sup>57</sup>. Principal component analysis  
347 confirmed that batch mixing had prevented introduction of experimental bias. Comparisons  
348 were conducted between early and late passaged cells. The analysis cut off criteria were fold  
349 change  $\geq \pm 1.5$  and  $P$ -value  $\leq 0.05$ . Microarray data was uploaded per MIAME standards and  
350 deposited at the GEO repository and is available under series record number GSE14837.

351

### 352 **HLA-DRA knockdown and blocking using siRNA and monoclonal antibodies**

353 A Sigma-Aldrich MISSION esiRNA endonuclease-derived mixture of siRNAs (EHU226621) was  
354 used to knock down HLA-DRA expression in Raji cells. Lipofectamine RNAiMAX transfection  
355 Reagent (Thermo Fisher Scientific, UK) was used to transfect exponentially grown Raji cells  
356 with 50 nM of siHLA-DRA or siRNA universal negative control (Sigma-Aldrich, UK; SIC001)  
357 according to the manufacturer's instructions. The transfection was repeated the following day  
358 and cells were collected after 48 h and either seeded at  $3 \times 10^4$  cells per well in a 96 well-plate  
359 for infection with PV or processed in order to validate siRNA activity. Total RNA and protein  
360 were collected and assessed by quantitative RT-PCR and western blot, respectively.

361 In order to evaluate the interaction of HLA-DR with H17 we used the HLA DRA mAb  
362 (302CT2.3.2), which is generated from mice immunized with a KLH conjugated synthetic

363 peptide between 48-75 amino acids from human HLA-DRA. After a 1 h pre-incubation with  
364 increasing concentrations of the antibody in normal growth media, Raji cells ( $3 \times 10^4$ ) were  
365 infected for 24-48 h with H17-or VSV-G-PV.

366

### 367 **Western blot analysis**

368 Washed cells were lysed on ice with lysis buffer [0.5% NP40 in PBS with 10 mM Tris-HCl, pH  
369 7.4 supplemented with Halt Protease Inhibitor mixture EDTA-free (Thermo Fisher Scientific  
370 UK)] and protein was quantified by the BCA assay kit (Thermo Fisher Scientific, UK). 20-50  $\mu$ g  
371 of protein was electrophoresed on a 4-15% sodium dodecylsulfate polyacrylamide gel,  
372 alongside a protein ladder (Precision Plus Protein Dual Colour Standards, Bio-Rad) and  
373 immunoblotted with the following antibodies using standard procedures: mouse monoclonal  
374 anti-HLA-DRA (1:1000; Clone: 302CT2, Enzo Life Sciences, UK) or rabbit monoclonal  $\alpha$ -tubulin  
375 (1:2000; Cell signalling Technology, UK) antibodies. The membranes were then washed with  
376 PBS for three times and incubated with goat anti-rabbit or donkey anti-mouse secondary  
377 antibodies (LI-COR) in the dark for 1 h. Scanning was then carried out using the Odyssey  
378 Imaging system (LI-COR).

379

### 380 **Immunofluorescence**

381 Transfected cells with HLA-DRA and -DRB1 expression plasmids or with the empty plasmid  
382 were seeded onto glass cover slips at  $5 \times 10^4$  cells/ml in 6 well plates overnight and were fixed  
383 with 4% paraformaldehyde in PBS for 30 minutes at room temperature (RT). Fixed cells were  
384 washed with PBS and permeabilised with 1% Triton X-100 in PBS for 10 minutes. After  
385 washing with PBS, the cover slips were incubated with a mouse HLA-DRA mAb (169-1B5.2;  
386 Bio-Techne Ltd) targeting a monomorphic general framework determinant of HLA-DR Class II  
387 antigen, diluted in 5% BSA/PBS for 1 hr at RT. The cover slips were then washed 3X with  
388 0.02% Tween 20 and 1% BSA in PBS, followed by incubation with Alexafluor 488 conjugated



389 anti-mouse (Thermo Fisher Scientific, UK) for 30 minutes at RT. After washing 3X with 0.02%  
390 Tween 20 and 1% BSA in PBS, the cover slips were mounted using Prolong Gold containing  
391 DAPI (Invitrogen). Images were acquired on EVOS fluorescent microscope (EVOS FL imaging  
392 system; Life Technology, USA). Experiments were carried out twice.

393

#### 394 **Flow cytometry**

395 For surface staining, human cancer cells and HEK293T/17 cells transfected with an empty  
396 vector or expression plasmids of HLA-DR ( $\alpha$  and  $\beta$ ) chains were maintained in the dark at 4°C  
397 throughout. Cells were collected, washed twice in ice-cold FACS buffer (2%FCS, 0.02% NaN<sub>3</sub>  
398 in PBS) and stained with a FITC-conjugated anti-human HLA-DR mAb (Clone Tü36; BD  
399 Biosciences). This antibody specifically binds to a monomorphic epitope of the HLA-DR  $\alpha\beta$   
400 complex and not the isolated  $\alpha$  or  $\beta$  chains or the HLA-DP and -DQ isotypes<sup>41</sup>. The cells were  
401 analyzed with BD LSR Fortessa to determine expression of HLA-DR in combination with the  
402 matched isotype control and sorted into HLA-DR<sup>-</sup> and HLA-DR<sup>+</sup> subpopulations with a FACS  
403 Aria cell sorter (BDIS, San Jose, CA, USA). The Hoechst 33342 stain was used for cell viability  
404 discrimination and the data files were analyzed using the FlowJo software (Tree Star, Inc., Sac  
405 Carlos, CA, USA). Data are representative of two independent experiments.

406

#### 407 **Relative and absolute mRNA quantification**

408 qRT-PCR was performed on RNA samples using a two-step procedure. RNA was first reverse-  
409 transcribed into cDNA using the QuantiTect Reverse Transcription Kit (Qiagen) according to  
410 manufacturer's instructions. qRT-PCR was then conducted on the cDNA in a 384-well plate  
411 with a ABI-7900HT Fast qRT-PCR system (Applied Biosystems). Mesa Green qRT-PCR  
412 MasterMix (Eurogentec) was added to the cDNA (5  $\mu$ l for every 2  $\mu$ l of cDNA). The following  
413 primers were used: for canine DLA-DRA (Forward: 5'-GCTGTGGACAAAGCTAACCTTG-3',  
414 Reverse: 5'-TCTGGAGGTACATTGGTGTTCG-3'), for canine DLA-DRB1 (Forward: 5'-

415 AGCACCAAGTTTGACAAGC-3', Reverse: 5-AAGAGCAGACCCAGGACAAAG-3'). The following  
416 amplification conditions were used: 95°C for 5 minutes; 40 cycles of 95°C for 15 seconds, 57°C  
417 for 20 seconds, and 72°C for 20 seconds; 95°C for 15 seconds; 60°C for 15 seconds; and 95°C  
418 for 15 seconds. The output Ct values and dissociation curves were analysed using SDS v2.3  
419 and RQ Manager v1.2 (Applied Biosystems). Gene expression data were normalized against  
420 the housekeeping gene GAPDH, and compared with the mock controls using the comparative  
421 C<sub>T</sub> method (also referred to as the 2<sup>-ΔΔCT</sup> method<sup>58</sup>). Absolute copy numbers of HLA-DRA in  
422 human cell lines were calculated using a standard curve of known concentrations of the  
423 corresponding HLA-DRA cDNA expression plasmid. HLA-DRA (Forward: 5'-  
424 TCAAGGGATTGCGCAAAGC-3' and reverse 5'- ACACCATCACCTCCATGTGC-3'. All experiments  
425 were carried out in triplicate.

426

## 427 **Prediction of transmembrane protein domains and subcellular topology and** 428 **phylogenetic analysis**

429 For each of the differentially regulated transcripts identified by microarrays, we used Phobius  
430 (<http://phobius.sbc.su.se>)<sup>59</sup> and TMHMM v2.0 (<http://www.cbs.dtu.dk/services/TMHMM/>)<sup>60</sup>  
431 to predict the existence of transmembrane protein domains. Similarly, we used Deeploc-1.0  
432 (<http://www.cbs.dtu.dk/services/DeepLoc/>)<sup>61</sup> to determine sub-cellular localisation of the  
433 encoded proteins. These predictions were compared with gene annotations and literature  
434 references to confirm their reliability. The amino acid sequences of canine DLA-DRA  
435 (NP\_001011723.1), human HLA-DRA (NP\_061984.2), and their bat orthologues [*Pteropus*  
436 *alecto* (XP\_006907484.1) and *Desmodus rotundus* (XP\_024413747.1)] were subjected to  
437 multiple alignment using CLC workbench 7 (CLC Bio, Qiagen, Aarhus, Denmark).

438

## 439 **Ethics statement**

440 The buffy coat residues for the isolation of CD19<sup>+</sup> primary B cells were purchased from the UK  
441 Blood Transfusion Service from anonymous volunteers blood donors. Therefore, no ethical  
442 approval is required.

443

#### 444 **Statistical Analyses**

445 Graphical representation and statistical analyses were performed using Prism 8 software  
446 (GraphPad). Unless otherwise stated, results are shown as means  $\pm$  SEM from three  
447 independent experiments. Differences were tested for statistical significance using one-way  
448 ANOVA with a Dunnett's or a Tukey *posthoc* test. All statistical analyses were two-sided, and p  
449 <0.05 was considered statistically significant.

450

#### 451 **Acknowledgements:**

452 Our thanks go to Jim Kaufman, Yanping Guo, Rob White, Amr Bayoumy, Ibrahim Elbusifi,  
453 Daragh Quinn and Alfred Ho for their technical assistance. This research was undertaken with  
454 the financial support of the Biotechnology and Biological Sciences Research Council (BBSRC)  
455 (<http://www.bbsrc.ac.uk>) via Strategic LoLa grant BB/K002465/1 "Developing Rapid  
456 Responses to Emerging Virus Infections of Poultry (DRREVIP)" and the Octoberwoman  
457 Foundation.

458

#### 459 **References:**

- 460 1. Tong S, *et al.* A distinct lineage of influenza A virus from bats. *Proc Natl Acad Sci U S A*  
461 **109**, 4269-4274 (2012).  
462
- 463 2. Tong S, *et al.* New world bats harbor diverse influenza A viruses. *PLoS Pathog* **9**,  
464 e1003657 (2013).  
465
- 466 3. Kandeil A, *et al.* Isolation and characterization of a distinct influenza A virus from  
467 Egyptian bats. *J Virol*, (2018).  
468
- 469 4. Brunotte L, Beer M, Horie M, Schwemmler M. Chiropteran influenza viruses: flu from  
470 bats or a relic from the past? *Curr Opin Virol* **16**, 114-119 (2016).

- 471  
472 5. Simonsen L. The global impact of influenza on morbidity and mortality. *Vaccine* **17**  
473 **Suppl 1**, S3-10 (1999).  
474  
475 6. Long JS, Mistry B, Haslam SM, Barclay WS. Host and viral determinants of influenza A  
476 virus species specificity. *Nat Rev Microbiol*, (2018).  
477  
478 7. Gamblin SJ, Skehel JJ. Influenza hemagglutinin and neuraminidase membrane  
479 glycoproteins. *J Biol Chem* **285**, 28403-28409 (2010).  
480  
481 8. Bertram S, Glowacka I, Steffen I, Kuhl A, Pohlmann S. Novel insights into proteolytic  
482 cleavage of influenza virus hemagglutinin. *Rev Med Virol* **20**, 298-310 (2010).  
483  
484 9. Lakadamyali M, Rust MJ, Zhuang X. Endocytosis of influenza viruses. *Microbes Infect* **6**,  
485 929-936 (2004).  
486  
487 10. Sauter NK, *et al.* Hemagglutinins from two influenza virus variants bind to sialic acid  
488 derivatives with millimolar dissociation constants: a 500-MHz proton nuclear  
489 magnetic resonance study. *Biochemistry* **28**, 8388-8396 (1989).  
490  
491 11. Edinger TO, Pohl MO, Stertz S. Entry of influenza A virus: host factors and antiviral  
492 targets. *J Gen Virol* **95**, 263-277 (2014).  
493  
494 12. Harrison SC. Viral membrane fusion. *Nat Struct Mol Biol* **15**, 690-698 (2008).  
495  
496 13. Air GM, Laver WG. The neuraminidase of influenza virus. *Proteins* **6**, 341-356 (1989).  
497  
498 14. Matrosovich MN, Matrosovich TY, Gray T, Roberts NA, Klenk HD. Neuraminidase is  
499 important for the initiation of influenza virus infection in human airway epithelium. *J*  
500 *Virol* **78**, 12665-12667 (2004).  
501  
502 15. Sun X, *et al.* Bat-derived influenza hemagglutinin H17 does not bind canonical avian or  
503 human receptors and most likely uses a unique entry mechanism. *Cell Rep* **3**, 769-778  
504 (2013).  
505  
506 16. Li Q, *et al.* Structural and functional characterization of neuraminidase-like molecule  
507 N10 derived from bat influenza A virus. *Proc Natl Acad Sci U S A* **109**, 18897-18902  
508 (2012).  
509  
510 17. Zhu X, *et al.* Crystal structures of two subtype N10 neuraminidase-like proteins from  
511 bat influenza A viruses reveal a diverged putative active site. *Proc Natl Acad Sci U S A*  
512 **109**, 18903-18908 (2012).  
513  
514 18. Wu Y, Wu Y, Tefsen B, Shi Y, Gao GF. Bat-derived influenza-like viruses H17N10 and  
515 H18N11. *Trends Microbiol* **22**, 183-191 (2014).  
516  
517 19. Maruyama J, *et al.* Characterization of the glycoproteins of bat-derived influenza  
518 viruses. *Virology* **488**, 43-50 (2016).  
519  
520 20. Garcia-Sastre A. The neuraminidase of bat influenza viruses is not a neuraminidase.  
521 *Proc Natl Acad Sci U S A* **109**, 18635-18636 (2012).

- 522  
523 21. Ciminski K, Thamamongood T, Zimmer G, Schwemmler M. Novel insights into bat  
524 influenza A viruses. *J Gen Virol* **98**, 2393-2400 (2017).  
525  
526 22. Mehle A. Unusual influenza A viruses in bats. *Viruses* **6**, 3438-3449 (2014).  
527  
528 23. Juozapaitis M, *et al.* An infectious bat-derived chimeric influenza virus harbouring the  
529 entry machinery of an influenza A virus. *Nat Commun* **5**, 4448 (2014).  
530  
531 24. Hoffmann M, Kruger N, Zmora P, Wrensch F, Herrler G, Pohlmann S. The  
532 Hemagglutinin of Bat-... *PLoS One* **11**, e0152134 (2016).  
533  
534 25. Zhou B, *et al.* Characterization of uncultivable bat influenza virus using a replicative  
535 synthetic virus. *PLoS Pathog* **10**, e1004420 (2014).  
536  
537 26. Moreira EA, *et al.* Synthetically derived bat influenza A-like viruses reveal a cell type-  
538 but not species-specific tropism. *Proc Natl Acad Sci U S A* **113**, 12797-12802 (2016).  
539  
540 27. Carnell GW, Ferrara F, Grehan K, Thompson CP, Temperton NJ. Pseudotype-based  
541 neutralization assays for influenza: a systematic analysis. *Front Immunol* **6**, 161 (2015).  
542  
543 28. Li Q, Liu Q, Huang W, Li X, Wang Y. Current status on the development of  
544 pseudoviruses for enveloped viruses. *Rev Med Virol* **28**, (2018).  
545  
546 29. King B, Daly J. Pseudotypes: your flexible friends. *Future Microbiol* **9**, 135-137 (2014).  
547  
548 30. Coakley E, Petropoulos CJ, Whitcomb JM. Assessing chemokine co-receptor usage in  
549 HIV. *Curr Opin Infect Dis* **18**, 9-15 (2005).  
550  
551 31. Cronin J, Zhang XY, Reiser J. Altering the tropism of lentiviral vectors through  
552 pseudotyping. *Curr Gene Ther* **5**, 387-398 (2005).  
553  
554 32. Carnell G, *et al.* The bat influenza H17N10 can be neutralized by broadly- neutralizing  
555 monoclonal antibodies and its neuraminidase can facilitate viral egress. bioRxiv  
556 499947; doi: <https://doi.org/10.1101/499947> (2018).  
557  
558 33. Dukes JD, Whitley P, Chalmers AD. The MDCK variety pack: choosing the right strain.  
559 *BMC Cell Biol* **12**, 43 (2011).  
560  
561 34. Nowak SA, Chou T. Mechanisms of receptor/coreceptor-mediated entry of enveloped  
562 viruses. *Biophys J* **96**, 2624-2636 (2009).  
563  
564 35. Byrd-Leotis L, Cummings RD, Steinhauer DA. The interplay between the host receptor  
565 and influenza virus hemagglutinin and neuraminidase. *Int J Mol Sci* **18**, (2017).  
566  
567 36. Kaufman JF, Auffray C, Korman AJ, Shackelford DA, Strominger J. The class II molecules  
568 of the human and murine major histocompatibility complex. *Cell* **36**, 1-13 (1984).  
569  
570 37. Blazekovic F, *et al.* HLA-DR peptide occupancy can be regulated with a wide variety of  
571 small molecules. *Hum Vaccin Immunother* **12**, 593-598 (2016).  
572

- 573 38. Jones EY, Fugger L, Strominger JL, Siebold C. MHC class II proteins and disease: a  
574 structural perspective. *Nat Rev Immunol* **6**, 271-282 (2006).  
575
- 576 39. Roche PA, Furuta K. The ins and outs of MHC class II-mediated antigen processing and  
577 presentation. *Nat Rev Immunol* **15**, 203-216 (2015).  
578
- 579 40. Nagy ZA, *et al.* Fully human, HLA-DR-specific monoclonal antibodies efficiently induce  
580 programmed death of malignant lymphoid cells. *Nat Med* **8**, 801-807 (2002).  
581
- 582 41. Ziegler A, *et al.* Analysis by sequential immunoprecipitations of the specificities of the  
583 monoclonal antibodies TU22, 34, 35, 36, 37, 39, 43, 58 and YD1/63. HLK directed  
584 against human HLA class II antigens. *Immunobiology* **171**, 77-92 (1986).  
585
- 586 42. Watanabe N, *et al.* A cell-based high-throughput screening assay system for inhibitor  
587 compounds of antigen presentation by HLA class II molecule. *Sci Rep* **7**, 6798 (2017).  
588
- 589 43. van Lith M, McEwen-Smith RM, Benham AM. HLA-DP, HLA-DQ, and HLA-DR have  
590 different requirements for invariant chain and HLA-DM. *J Biol Chem* **285**, 40800-40808  
591 (2010).  
592
- 593 44. Grove J, Marsh M. The cell biology of receptor-mediated virus entry. *J Cell Biol* **195**,  
594 1071-1082 (2011).  
595
- 596 45. Stamatakis Z, *et al.* Hepatitis C virus association with peripheral blood B lymphocytes  
597 potentiates viral infection of liver-derived hepatoma cells. *Blood* **113**, 585-593 (2009).  
598
- 599 46. Lemon K, *et al.* Early target cells of measles virus after aerosol infection of non-human  
600 primates. *PLoS Pathog* **7**, e1001263 (2011).  
601
- 602 47. Shannon-Lowe CD, Neuhierl B, Baldwin G, Rickinson AB, Delecluse HJ. Resting B cells  
603 as a transfer vehicle for Epstein-Barr virus infection of epithelial cells. *Proc Natl Acad Sci U S A* **103**, 7065-7070 (2006).  
604  
605
- 606 48. Rensing ME, *et al.* Interference with T cell receptor-HLA-DR interactions by Epstein-  
607 Barr virus gp42 results in reduced T helper cell recognition. *Proc Natl Acad Sci U S A*  
608 **100**, 11583-11588 (2003).  
609
- 610 49. Rensing ME, *et al.* Epstein-Barr virus gp42 is posttranslationally modified to produce  
611 soluble gp42 that mediates HLA class II immune evasion. *J Virol* **79**, 841-852 (2005).  
612
- 613 50. Wiertz EJ, Devlin R, Collins HL, Rensing ME. Herpesvirus interference with major  
614 histocompatibility complex class II-restricted T-cell activation. *J Virol* **81**, 4389-4396  
615 (2007).  
616
- 617 51. Jeffers SA, *et al.* CD209L (L-SIGN) is a receptor for severe acute respiratory syndrome  
618 coronavirus. *Proc Natl Acad Sci U S A* **101**, 15748-15753 (2004).  
619
- 620 52. Li W, *et al.* Angiotensin-converting enzyme 2 is a functional receptor for the SARS  
621 coronavirus. *Nature* **426**, 450-454 (2003).  
622



- 623 53. Ferrara F, *et al.* The human Transmembrane Protease Serine 2 is necessary for the  
624 production of Group 2 influenza A virus pseudotypes. *J Mol Genet Med* **7**, 309-314  
625 (2012).  
626
- 627 54. Zufferey R, Nagy D, Mandel RJ, Naldini L, Trono D. Multiply attenuated lentiviral vector  
628 achieves efficient gene delivery in vivo. *Nat Biotechnol* **15**, 871-875 (1997).  
629
- 630 55. Demaison C, *et al.* High-level transduction and gene expression in hematopoietic  
631 repopulating cells using a human immunodeficiency virus type 1-based lentiviral  
632 vector containing an internal spleen focus forming virus promoter. *Hum Gene Ther* **13**,  
633 803-813 (2002).  
634
- 635 56. Cox RJ, Mykkeltvedt E, Robertson J, Haaheim LR. Non-lethal viral challenge of influenza  
636 haemagglutinin and nucleoprotein DNA vaccinated mice results in reduced viral  
637 replication. *Scand J Immunol* **55**, 14-23 (2002).  
638
- 639 57. Giotis ES, Ross CS, Robey RC, Nohturfft A, Goodbourn S, Skinner MA. Constitutively  
640 elevated levels of SOCS1 suppress innate responses in DF-1 immortalised chicken  
641 fibroblast cells. *Sci Rep* **7**, 17485 (2017).  
642
- 643 58. Pfaffl MW. A new mathematical model for relative quantification in real-time RT-PCR.  
644 *Nucleic Acids Res* **29**, e45 (2001).  
645
- 646 59. Kall L, Krogh A, Sonnhammer EL. Advantages of combined transmembrane topology  
647 and signal peptide prediction--the Phobius web server. *Nucleic Acids Res* **35**, W429-  
648 432 (2007).  
649
- 650 60. Krogh A, Larsson B, von Heijne G, Sonnhammer EL. Predicting transmembrane protein  
651 topology with a hidden Markov model: application to complete genomes. *J Mol Biol*  
652 **305**, 567-580 (2001).  
653
- 654 61. Almagro Armenteros JJ, Sonderby CK, Sonderby SK, Nielsen H, Winther O. DeepLoc:  
655 prediction of protein subcellular localization using deep learning. *Bioinformatics* **33**,  
656 4049 (2017).  
657  
658  
659  
660

661 **Figure legends:**

662 **Figure 1: a.** Schematic representation of pseudotype virus production. Expression plasmids  
663 for the HIV-1 gag-pol gene, the bat H17 alone or with N10, the luciferase reporter gene with  
664 HIV-1 long tandem repeats (LTRs) and the protease gene (HAT or TMPRSS2) are generated  
665 and co-transfected into producer HEK293T/17 cells. Cells transcribe and translate the HIV-1  
666 core genes, BatIV glycoproteins are packaged on the cell surface, and viruses bud off in an  
667 HIV-1 dependent manner. Production of N10-PV does not require co-transfection with a



668 protease gene. Supernatants are harvested at 48 h post-transfection and the produced  
 669 pseudotype viruses (PVs) are filtered, titrated and infected into target cells. **b.** Infectivity  
 670 titers of H17-PV in cells from different tissues/species [expressed in Relative Luciferase Units  
 671 (RLU)/ml]. Mean luciferase activity was plotted as mean  $\pm$  inter-assay deviation expressed as  
 672 SEM from 3-6 independent experiments. **c.** Infectivity titers of H17-PV, N10 and control  
 673 pseudotypes (VSV-G, H5 and  $\Delta$ -env) in MDCK II cells. **d.** MDCK II cells were pre-treated with  
 674 either neuraminidase (2 h), with pronase (30 mins) or tunicamycin (5 h) or treated with  
 675 ammonium chloride, and then infected with H17-PV. Luciferase activities were measured  
 676 after 24 h with a luminometer. The left Y-axis shows infection levels (% of control) and the  
 677 right Y-axis shows % viability of cells related to control MDCK II cells. Experiments were  
 678 carried out in triplicate.

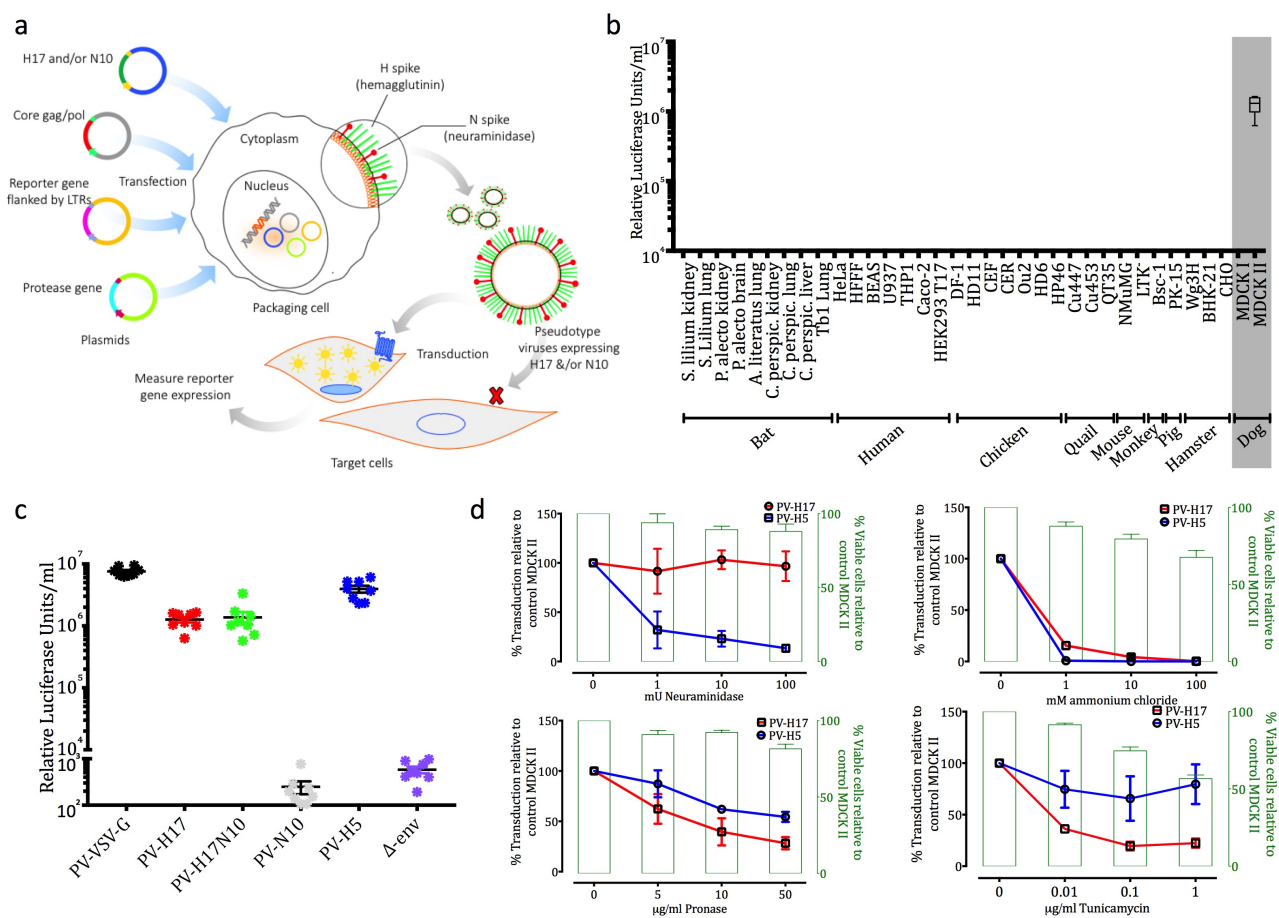

679

680

681

682 **Figure 2: a.** Significantly expressed genes in the microarray comparison of late versus early  
683 passaged MDCK cells (green and red columns represent upregulated transcripts in MDCK II  
684 and MDCK I cells respectively). Analysis was conducted with Partek (fold change  $\geq 1.5$  and  
685  $FDR \leq 0.05$ ). Red frame indicates the transcript upregulated in late passaged MDCK cells  
686 encoding a membrane protein. **b.** qRT-PCR results showing the expression of DLA-DRA and  
687 DLA-DRB1 mRNA in MDCK I and II cells. The data are expressed as the means  $\pm$  S.E.M. from  
688 three independent experiments. One-way Anova with Tukey *posthoc* test were used to analyse  
689 the data.  $**P < 0.005$  versus control. **c.** Schematic diagram of the MHC II surface molecules. **d.**  
690 Left Y-axis (green box and whiskers): relative infection titers of H17-PV [ $\log_{10}$  Relative  
691 Luciferase Units (RLU) /ml] in a panel of human cancer cell lines. Right Y-axis (broken purple  
692 line) shows  $\log_{10}$  HLA-DRA mRNA copies with qRT-PCR. The data are expressed as the means  
693  $\pm$  S.E.M. from three independent experiments. **e.** FACS analysis of the expression levels of cell-  
694 surface HLA-DR molecule from three H17-PV susceptible and three unsusceptible cancer cell  
695 lines. Results are representative from two independent experiments. Blue and red peaks  
696 represent HLA-DR<sup>-</sup> and HLA-DR<sup>+</sup> subpopulations respectively. **f.** Left: infection titers of VSV-G-  
697 and H17-PV (RLU/ml) in Raji cells transfected with siControl or siHLA-DRA. Right: western  
698 blot (top) and qRT-PCR (bottom) showing expression of HLA-DRA protein and mRNA in  
699 transfected Raji with siRNA versus siControl. Experiments were carried out twice and the  
700 data are expressed as means  $\pm$  S.E.M. One-way Anova with Dunnett *posthoc* test were used to  
701 analyse the data.  $**P < 0.005$  versus siControl. **g.** Relative infection titers of VSV-G- and H17-PV  
702 (RLU/ml) in Raji cells incubated with different concentrations of a monoclonal antibody  
703 targeting HLA-DRA. The data are expressed as the means  $\pm$  S.E.M. from three independent  
704 experiments. **h.** FACS analysis of the expression levels of cell-surface HLA-DR heterodimer in  
705 transiently transfected HEK293T/17 cells for 48 h with expression vectors for DRA and DRB1  
706 (1:1 ratio). Right hand corner microscopy picture (80x) shows immunofluorescence  
707 confirming surface expression of HLA-DR on cells (green stain: FITC-HLA-DR and blue: DAPI).

708 The data are representative from two independent experiments. **i.** Relative infection titers of  
 709 VSV-G- and H17-PV [in log<sub>10</sub> Relative Luciferase Units (RLU) /ml] in FACS-sorted DR-  
 710 HEK293T/17 cells, unsorted transiently transfected (DR<sup>+</sup> & DR<sup>-</sup>) and FACS-sorted DR<sup>+</sup> cells.  
 711 Experiments were carried out twice and the data are expressed as the means ± S.E.M. One-  
 712 way Anova with Dunnett *posthoc* test were used to analyse the data. \*\**P*<0.005 versus DR-  
 713 cells.

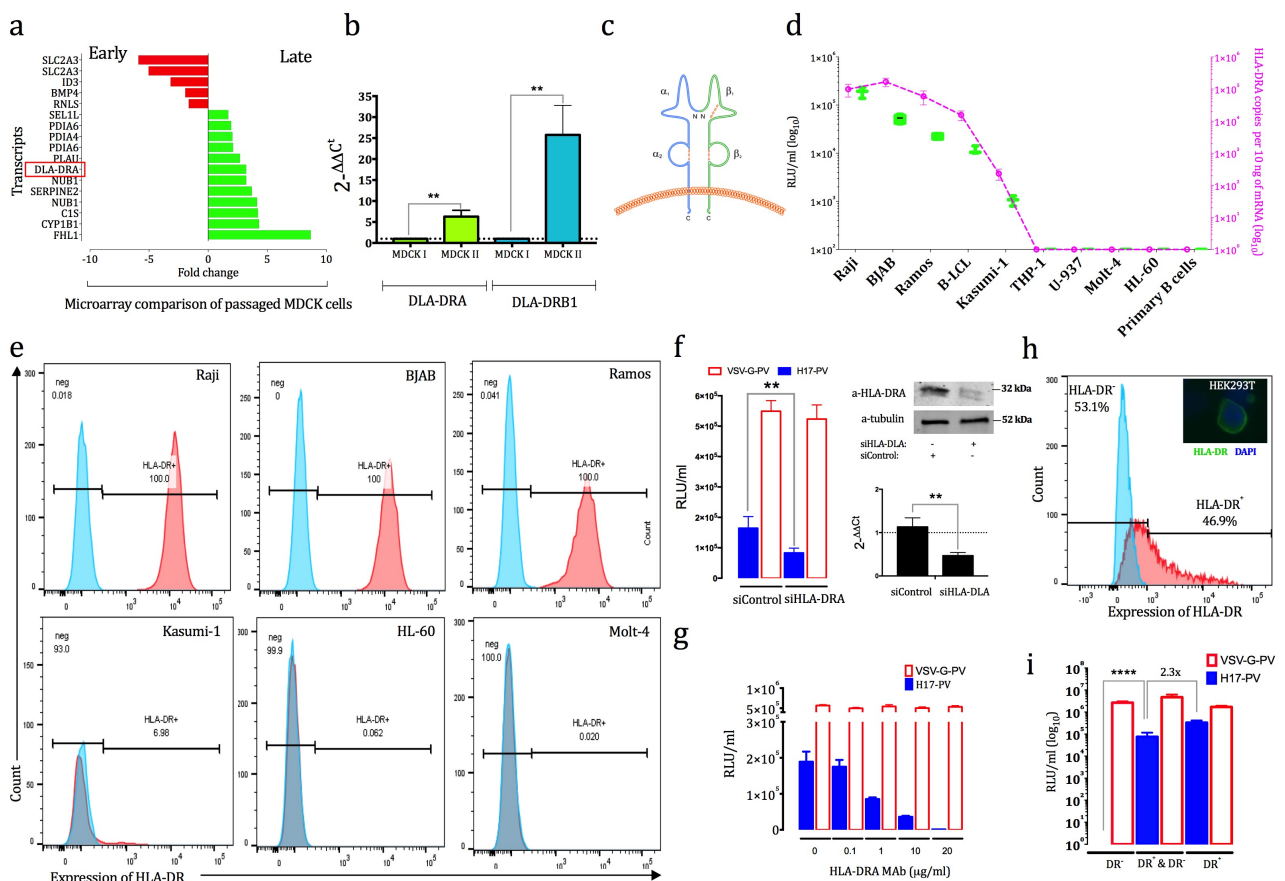

714

715

716

717

718

719

720

721

722 **Supplementary material**

723 **Supplementary Material 1: List of cell lines included in the study.**

| Cell line                 | Type of cells                     | Species                       | Origin                                                                                                                        |
|---------------------------|-----------------------------------|-------------------------------|-------------------------------------------------------------------------------------------------------------------------------|
| Raji                      | Burkitt's lymphoma mature B-cells | Human                         | ATCC CCL-86                                                                                                                   |
| Ramos                     | Burkitt's lymphoma mature B-cells | Human                         | ATCC CRL-1596                                                                                                                 |
| BJAB                      | Burkitt's lymphoma mature B-cells | Human                         | CVCL_5711                                                                                                                     |
| HL-60                     | Promyeloblasts                    | Human                         | ATCC CCL-240                                                                                                                  |
| Molt-4                    | T lymphoblasts                    | Human                         | ATCC CRL-1582                                                                                                                 |
| Jurkat                    | T lymphocytes                     | Human                         | ATCC TIB-152                                                                                                                  |
| U-937                     | Monocytic leukemia                | Human                         | ATCC CRL-1593.2                                                                                                               |
| THP-1                     | Monocytic lymphoma                | Human                         | ATCC TIB-202                                                                                                                  |
| B-LCLs                    | B-lymphoblastoid                  | Human                         | DOI: <a href="https://doi.org/10.1093/nar/gkw1167">10.1093/nar/gkw1167</a>                                                    |
| Kasumi-1                  | Myeloblasts                       | Human                         | ATCC CRL-2724                                                                                                                 |
| Tb1 Lu                    | Epithelial lung                   | <i>Tadarida brasiliensis</i>  | ATCC CCL-88                                                                                                                   |
| <i>S. liliun</i> lung     | Lung                              | <i>Sturnira liliun</i>        | Adolfo-Garcia Sastres & Martinez (The Icahn School of Medicine at Mount Sinai, NY, USA)/Aguilera's labs (Univ. of Costa Rica) |
| <i>S. liliun</i> kidney   | Kidney                            | <i>Sturnira liliun</i>        |                                                                                                                               |
| <i>Ar. literatus</i> lung | Lung                              | <i>Artibeus literatus</i>     |                                                                                                                               |
| <i>C. perspic</i> kidney  | Kidney                            | <i>Carollia perspicillata</i> |                                                                                                                               |
| <i>C. perspic</i> lung    | Lung                              | <i>Carollia perspicillata</i> |                                                                                                                               |
| <i>C. perspic</i> liver   | Liver                             | <i>Carollia perspicillata</i> |                                                                                                                               |
| PakiT03 cells             | Epithelial kidney                 | <i>Pteropus Alecto</i>        | Linfa Wang lab, NUS<br>DOI: <a href="https://doi.org/10.1371/journal.pone.000826">10.1371/journal.pone.000826</a>             |
| PaBr cells                | Brain                             | <i>Pteropus Alecto</i>        |                                                                                                                               |
| A549 cells                | Epithelial lung                   | Human                         | ATCC CRM-CCL-185                                                                                                              |
| BEAS-2B                   | Epithelial lung/bronchus          | Human                         | ATCC CRL-9609                                                                                                                 |
| HFF-1                     | Skin fibroblasts                  | Human                         | ATCC SCRC-1041                                                                                                                |
| HeLa                      | Epithelial cervix                 | Human                         | ATCC CCL-2                                                                                                                    |
| HeLa S3                   | Epithelial cervix                 | Human                         | ATCC CCL-2.2                                                                                                                  |
| Caco-2                    | Epithelial colon                  | Human                         | ATCC HTB-37                                                                                                                   |
| HEK293T17                 | Kidney                            | Human                         | ATCC CRL-11268                                                                                                                |
| DF-1                      | Embryo fibroblast                 | Chicken                       | ATCC CRL-12203                                                                                                                |
| HD11                      | Macrophages                       | Chicken                       | CVCL_4685                                                                                                                     |
| CEF                       | Embryo fibroblasts                | Chicken                       | The Pirbright Institute, UK                                                                                                   |
| CER                       | Embryo-related                    | Chicken                       | DOI: <a href="https://doi.org/10.1016/j.biologicals.2005.08.001">10.1016/j.biologicals.2005.08.001</a>                        |
| Ou2                       | Fibroblasts                       | Chicken                       | CVCL_Y589                                                                                                                     |
| HD6                       | Erythroblasts                     | Chicken                       | PMCID: PMC230774                                                                                                              |

|          |                                   |         |                                                                                          |
|----------|-----------------------------------|---------|------------------------------------------------------------------------------------------|
| HP46     | ALV-carcinoma                     | Chicken | PMCID: PMC361083                                                                         |
| Cu447    | Tumor cell line                   | Quail   | DOI: <a href="https://doi.org/10.1637/7182-032604R">10.1637/7182-032604R</a>             |
| Cu453    | Tumor cell line                   | Quail   | DOI: <a href="https://doi.org/10.1637/7182-032604R">10.1637/7182-032604R</a>             |
| QT35     | Muscle fibroblasts                | Quail   | ECACC:93120832                                                                           |
| NMuMG    | Mammary gland                     | Mouse   | ATCC CRL-1636                                                                            |
| LTK-11   | Fibroblasts                       | Mouse   | ATCC CRL-10422                                                                           |
| BS-C-1   | Kidney epithelial                 | Monkey  | ATCC CCL 26                                                                              |
| PK-15    | Kidney epithelial                 | Pig     | ATCC CCL-33                                                                              |
| Wg3HCL2  | HGPRT-Chinese hamster fibroblasts | Hamster | DOI: <a href="https://doi.org/10.1186/1297-9686-34-4-521">10.1186/1297-9686-34-4-521</a> |
| BHK-21   | Kidney fibroblast                 | Hamster | ATCC CCL-10                                                                              |
| CHO 1-15 | Ovary epithelial                  | Hamster | ATCC CRL-9606                                                                            |
| NBL-2    | Epithelial kidney                 | Canine  | ATCC CCL-34                                                                              |
| MDCK I   | Epithelial kidney                 | Canine  | EEACC 00062106                                                                           |
| MDCK II  | Epithelial kidney                 | Canine  | EEACC 00062107                                                                           |

724

725

726 **Supplementary Material 2: List of the differentially regulated genes determined by**  
727 **microarray comparison between early and late passaged MDCK cells, as summarised in**  
728 **Fig. 2a.** The encoded proteins of the differentially regulated transcripts were surveyed for  
729 their subcellular localisation (with the DeepLoc server) and presence of transmembrane  
730 domains (using the PHOBIUS and TMHMM algorithms).

| Affymetrix ID         | Refseq ID                                                 | Gene symbol | Gene name                                             | Subcellular localisation (DeepLoc server) | Predicted transmembrane domains |                | FDR      | Fold change |
|-----------------------|-----------------------------------------------------------|-------------|-------------------------------------------------------|-------------------------------------------|---------------------------------|----------------|----------|-------------|
|                       |                                                           |             |                                                       |                                           | TMHMM server                    | Phobius server |          |             |
| Cfa.12195.3.S1_at     | XM_003435535<br>XM_005641862<br>XM_014111636<br>XM_861215 | FHL1        | Four and a half LIM domains 1                         | Nucleus, Soluble                          | 0                               |                | 2.63E-05 | 8.68212     |
| CfaAffx.10229.1.S1_at | NM_001159684                                              | CYP1B1      | Cytochrome P450, family 1, subfamily B, polypeptide 1 | Endoplasmic reticulum, Membrane           | 0                               |                | 1.28E-05 | 4.30944     |
| Cfa.10821.1.A1_s_at   | XM_005637210<br>XM_848227                                 | C1S         | Complement component 1, s subcomponent                | Extracellular, Soluble                    | 0                               |                | 4.36E-06 | 4.21145     |

|                      |                                              |          |                                                                                     |                                |   |         |          |         |
|----------------------|----------------------------------------------|----------|-------------------------------------------------------------------------------------|--------------------------------|---|---------|----------|---------|
| Cfa.12556.1.A1_at    | XM_014119919                                 | NUB1     | Negative regulator of ubiquitin-like proteins 1                                     | Cytoplasm, Soluble             | 0 |         | 2.01E-05 | 4.14298 |
| Cfa.4394.1.S1_at     | XM_014111110                                 | SERPINE2 | Serpin peptidase inhibitor, clade E (nexin, plasminogen activator inhibitor type 1) | Extracellular, Soluble         | 0 |         | 2.01E-05 | 3.70338 |
| Cfa.7284.1.A1_s_at   | XM_014119919                                 | NUB1     | Negative regulator of ubiquitin-like proteins 1                                     | Cytoplasm, Soluble             | 0 |         | 2.21E-05 | 3.22491 |
| Cfa.6456.1.S1_at     | NM_001011723<br>XM_005627066<br>XM_005627067 | DLA-DRA  | MHC class II DR alpha chain                                                         | Cell membrane, Membrane        | 1 | 221-241 | 2.77E-05 | 3.21344 |
| Cfa.127.1.S1_s_at    | NM_001194952                                 | PLAU     | Plasminogen activator, urokinase                                                    | Extracellular, Soluble         | 0 | 20-40   | 2.14E-05 | 2.69368 |
| CfaAffx.6163.1.S1_at | XM_532876                                    | PDIA6    | Protein disulfide isomerase family A, member 6                                      | Endoplasmic reticulum, Soluble | 0 |         | 1.83E-05 | 2.10444 |
| Cfa.4275.2.S1_at     | XM_843145                                    | PDIA4    | Protein disulfide isomerase family A, member 4                                      | Endoplasmic reticulum, Soluble | 1 |         | 8.19E-06 | 2.05558 |

|                         |                                                                           |        |                                                                        |                                 |    |                                                                                                                                       |          |              |
|-------------------------|---------------------------------------------------------------------------|--------|------------------------------------------------------------------------|---------------------------------|----|---------------------------------------------------------------------------------------------------------------------------------------|----------|--------------|
| CfaAffx.6163.1.S1_s_at  | XM_532876                                                                 | PDIA6  | Protein disulfide isomerase family A, member 6                         | Endoplasmic reticulum, Soluble  | 0  |                                                                                                                                       | 8.36E-06 | 1.9391       |
| CfaAffx.26500.1.S1_s_at | XM_014116111<br>XM_537530                                                 | SEL1L  | Sel-1 suppressor of lin-12-like (C. elegans)                           | Endoplasmic reticulum, Membrane | 1  | 768-786                                                                                                                               | 5.15E-06 | 1.69924      |
| Cfa.12560.1.A1_at       | XM_005636642<br>XM_014108134<br>XM_847958<br>XR_001314613<br>XR_001314614 | RNLS   | Renalase, FAD-dependent amine oxidase                                  | Mitochondrion, Membrane         | 0  |                                                                                                                                       | 3.65E-07 | -<br>1.64221 |
| CfaAffx.22914.1.S1_at   | NM_001287170                                                              | BMP4   | Bone morphogenetic protein 4                                           | Nucleus, Soluble                | 0  |                                                                                                                                       | 2.56E-05 | -<br>1.93435 |
| Cfa.64.1.S1_at          | NM_001003025                                                              | ID3    | Inhibitor of DNA binding 3, dominant negative helix-loop-helix protein | Nucleus, Soluble                | 0  |                                                                                                                                       | 3.38E-06 | -<br>3.17884 |
| Cfa.825.1.S2_at         | NM_001003308                                                              | SLC2A3 | Solute carrier family 2 (facilitated glucose transporter), member 3    | Cell membrane, Membrane         | 10 | 7-26,<br>62-85,<br>97-115,<br>121-142,<br>154-177,<br>183-205,<br>270-293,<br>305-326,<br>333-355,<br>361-379,<br>400-420,<br>426-448 | 6.71E-06 | -<br>5.03551 |



|                       |              |        |                                                                     |                         |    |                                                                                                                                                                       |   |         |
|-----------------------|--------------|--------|---------------------------------------------------------------------|-------------------------|----|-----------------------------------------------------------------------------------------------------------------------------------------------------------------------|---|---------|
|                       |              |        |                                                                     |                         |    | 7-26,<br>62-85,<br>97-115,<br>121-<br>142,<br>154-<br>177,<br>183-<br>205,<br>270-<br>293,<br>305-<br>326,<br>333-<br>355,<br>361-<br>379,<br>400-<br>420,<br>426-448 |   |         |
| CfaAffx.21479.1.S1_at | NM_001003308 | SLC2A3 | Solute carrier family 2 (facilitated glucose transporter), member 3 | Cell membrane, Membrane | 10 | 2.21E-05                                                                                                                                                              | - | 5.89883 |

731

732

733 **Supplementary Material 3: The ectodomain of HLA-DRA is well conserved in bats,**  
734 **humans and canine.**

735 Multiple amino acid sequence alignment of canine DLA-DRA (NP\_001011723.1), human HLA-  
736 DRA (NP\_061984.2), and their bat orthologues [(Yinpterochiroptera *Pteropus alecto*  
737 (XP\_006907484.1) and Yangochiroptera *Desmodus rotundus* (XP\_024413747.1)]. *Desmodus*  
738 *rotundus* (common vampire bat) was chosen as the closest species to *Sturnira lilium* with a  
739 decoded genome. The alignment was performed by importing the corresponding amino acid  
740 sequences into CLC Workbench (CLC Bio, Qiagen, Aarhus, Denmark). Orange arrows indicate  
741 the ectodomain of the protein. Matrix below shows overall, pairwise amino acid similarity of  
742 HLA-DRA between the four species. The percent amino acid similarity values were calculated  
743 with the CLC workbench program.

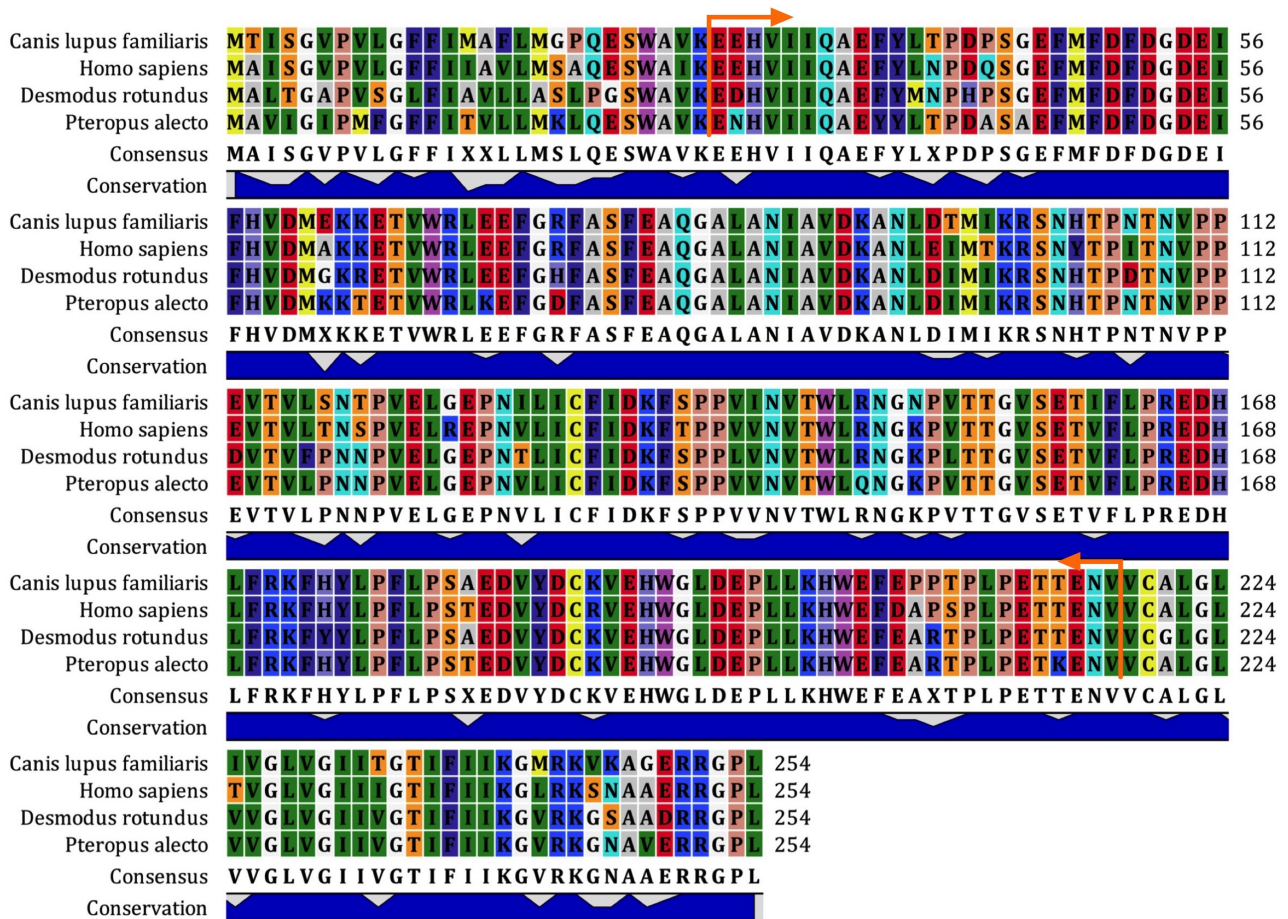

|                        | 1 | 2     | 3     | 4     |
|------------------------|---|-------|-------|-------|
| Canis lupus familiaris | 1 | 89.01 | 88.48 | 89.53 |
| Homo sapiens           | 2 | 89.01 | 86.39 | 87.96 |
| Desmodus rotundus      | 3 | 88.48 | 86.39 | 89.01 |
| Pteropus alecto        | 4 | 89.53 | 87.96 | 89.01 |

744

745 **Supplementary Material 4: Transfection of HEK293T/17 with HLA-DR  $\alpha$  and  $\beta$  chains**  
 746 **results in surface expression of the heterodimer.**

747 HEK293T/17 cells were transfected with the empty vector or with HLA-DRA and DRB1  
 748 expression plasmids. The cells were fixed in paraformaldehyde and were permeabilised with  
 749 Triton X-100 to show intracellular distribution and immuno-stained with mAb HLA-DRA.  
 750 Nuclei were stained blue with DAPI stain (left panel), HLA-DR heterodimers were stained  
 751 green (middle panel), and the right panel shows a merged image. Fluorescent microscopy  
 752 analysis was performed with the EVOS FL fluorescent imaging system. Original magnification,  
 753  $\times 20$ .

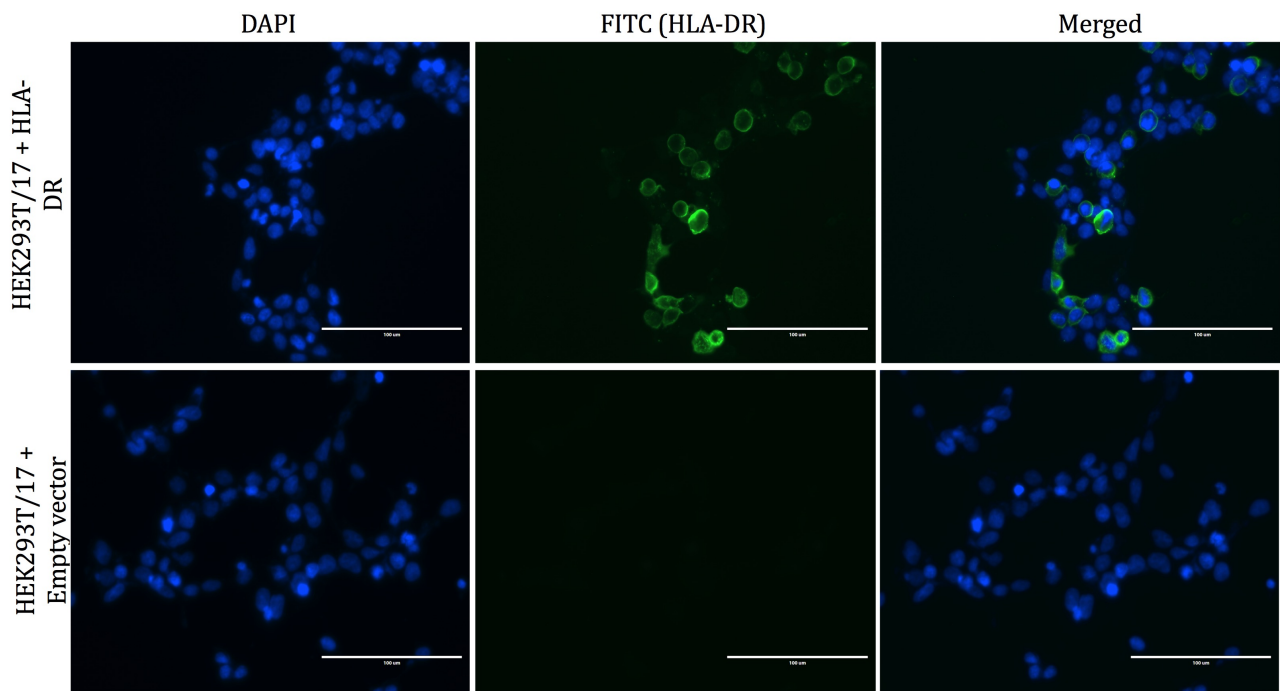

754

755 **Supplementary Material 5: Transfection of bat PakiTO3 cells with HLA-DR  $\alpha$  and  $\beta$**   
756 **chains confers susceptibility to H17-PV.**

757 Infectivity titers of H17-PV (RLU/ml) in PakiTO3 cells transfected for 48 h with equimolar  
758 amounts of either empty vector (pcDNA3.1) or the expression plasmid for HLA-DRA or the  
759 expression plasmids encoding both chains of HLA-DR. Cells were infected with PV for an extra  
760 72 h in the presence of neomycin. Data represent mean values  $\pm$  SEM of three independent  
761 experiments. One-way Anova with Dunnett *posthoc* test were used to analyse the data.  
762 \*\*\*\* $P < 0.00005$  versus cells transfected with the empty vector.

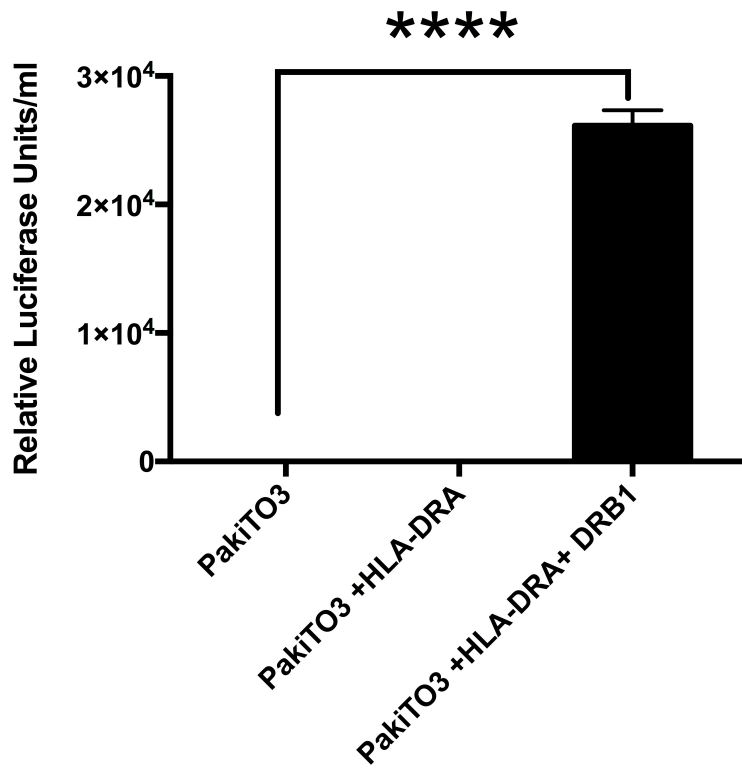

Source: https://www.biorxiv.org/content/10.1101/507467v1.full.pdf
